1 Streptococcal phosphotransferase system imports unsaturated hyaluronan disaccharide derived  
2 from host extracellular matrices

3

4 **RUNNING TITLE**

5 Phosphotransferase system for fragmented hyaluronan

6

7 **Sayoko Oiki,<sup>a</sup> Yusuke Nakamichi,<sup>a\*</sup> Yukie Maruyama,<sup>b</sup> Bunzo Mikami,<sup>c</sup> Kousaku Murata,<sup>b</sup>**

8 **Wataru Hashimoto<sup>a</sup>**

9

10 <sup>a</sup>Laboratory of Basic and Applied Molecular Biotechnology, Division of Food Science and  
11 Biotechnology, Graduate School of Agriculture, Kyoto University, Uji, Kyoto 611-0011, Japan;

12 <sup>b</sup>Laboratory of Food Microbiology, Department of Life Science, Faculty of Science and  
13 Engineering, Setsunan University, Neyagawa, Osaka 572-8508, Japan; <sup>c</sup>Laboratory of Applied

14 Structural Biology, Division of Applied Life Sciences, Graduate School of Agriculture, Kyoto  
15 University, Uji, Kyoto 611-0011, Japan

16

17 Address correspondence to Wataru Hashimoto, [whasimot@kais.kyoto-u.ac.jp](mailto:whasimot@kais.kyoto-u.ac.jp)

18

19 \*Present address: Research Institute for Sustainable Chemistry, National Institute of Advanced  
20 Industrial Science and Technology, Higashi-hiroshima, Hiroshima 739-0046, Japan

21

22 **ABSTRACT (247/250 words)**

23 Certain bacterial species target the polysaccharide glycosaminoglycans (GAGs) of animal  
24 extracellular matrices for colonization and/or infection. GAGs such as hyaluronan and  
25 chondroitin sulfate consist of repeating disaccharide units of uronate and amino sugar residues,  
26 and are depolymerized to unsaturated disaccharides by bacterial extracellular or cell-surface  
27 polysaccharide lyase. The disaccharides are degraded and metabolized by cytoplasmic enzymes  
28 such as unsaturated glucuronyl hydrolase, isomerase, and reductase. The genes encoding these  
29 enzymes are assembled to form a GAG genetic cluster. Here, we demonstrate the *Streptococcus*  
30 *agalactiae* phosphotransferase system (PTS) for import of unsaturated hyaluronan disaccharide.  
31 *S. agalactiae* NEM316 was found to depolymerize and assimilate hyaluronan, whereas its mutant  
32 with a disruption in PTS genes included in the GAG cluster was unable to grow on hyaluronan,  
33 while retaining the ability to depolymerize hyaluronan. Using toluene-treated wild-type cells, the  
34 PTS import activity of unsaturated hyaluronan disaccharide was significantly higher than that  
35 observed in the absence of the substrate. In contrast, the PTS mutant was unable to import  
36 unsaturated hyaluronan disaccharide, indicating that the corresponding PTS is the only importer

37 of fragmented hyaluronan, which is suitable for PTS to phosphorylate the substrate at the C-6  
38 position. The three-dimensional structure of streptococcal EIIA, one of the PTS components, was  
39 found to contain a Rossmann-fold motif by X-ray crystallization. Docking of EIIA with another  
40 component EIIB by modeling provided structural insights into the phosphate transfer mechanism.  
41 This study is the first to identify the substrate (unsaturated hyaluronan disaccharide) recognized  
42 and imported by the streptococcal PTS.

43

#### 44 **IMPORTANCE (118/120 words)**

45 The PTS identified in this work imports sulfate group-free unsaturated hyaluronan disaccharide  
46 as a result of the phosphorylation of the substrate at the C-6 position. *S. agalactiae* can be  
47 indigenous to animal hyaluronan-rich tissues owing to the bacterial molecular system for  
48 fragmentation, import, degradation, and metabolism of hyaluronan. Distinct from hyaluronan,  
49 most GAGs, which are sulfated at the C-6 position, are unsuitable for PTS due to its inability to  
50 phosphorylate the substrate. More recently, we have identified a solute-binding  
51 protein-dependent ABC transporter in a pathogenic *Streptobacillus moniliformis* as an importer  
52 of sulfated and non-sulfated fragmented GAGs without any substrate modification. Our findings  
53 regarding PTS and ABC transporter shed light on bacterial clever colonization/infection system  
54 targeting various animal GAGs.

55

56 **KEYWORDS**

57 glycosaminoglycan, hyaluronan, *Streptococcus*, sugar import, crystallography

58

59 **INTRODUCTION**

60 Extracellular matrices of all animal tissues and organs serve as physical scaffolds for  
61 cellular constituents, cell differentiation and proliferation, homeostasis, and tissue formation (1).  
62 Glycosaminoglycans (GAGs), constituents of the matrices (2), are acidic polysaccharides  
63 consisting of repeating disaccharide units of uronate and amino sugar residues. Hyaluronan,  
64 chondroitin sulfate, heparin, and heparan sulfate are classified as GAGs based on their  
65 constituent monosaccharides, glycoside linkages, and sulfation patterns (3, 4). Hyaluronan  
66 consists of D-glucuronate (GlcUA) and *N*-acetyl-D-glucosamine (GlcNAc), chondroitin sulfates  
67 of GlcUA and *N*-acetyl-D-galactosamine (GalNAc), and heparin and heparan sulfate of GlcUA or  
68 L-iduronate (IdoUA), and D-glucosamine (GlcN) or GlcNAc (5) (Fig. S1). The uronate and  
69 amino sugar residues in hyaluronan and chondroitin sulfate are linked by 1,3-glycoside bonds,  
70 whereas the residues in heparin and heparan sulfate are connected by 1,4-glycoside bonds. With  
71 the exception of hyaluronan, these GAGs frequently contain sulfate groups in the uronate and/or  
72 amino sugar residues, and function as protein-binding proteoglycans in extracellular matrices.

73        Some bacteria including staphylococci and streptococci target animal GAGs for  
74        colonization and/or infection (6). Streptococci are known to invade host cells by the  
75        depolymerization of hyaluronan using cell-surface hyaluronate lyase that produces unsaturated  
76        disaccharides with C=C double bonds at the nonreducing terminus of the uronate residue,  
77        through a  $\beta$ -elimination reaction (7–11) (Fig. 1A). Our previous reports indicate that the resulting  
78        unsaturated GAG disaccharides are degraded in the cytoplasm by unsaturated glucuronyl  
79        hydrolase (UGL) into monosaccharides (unsaturated uronate and amino sugar), through the  
80        hydration of the C=C double bonds (12–14). Moreover, unsaturated uronate was shown to  
81        metabolize to pyruvate and glyceraldehyde-3-phosphate through successive reactions catalyzed  
82        by isomerase (DhuI), NADH-dependent reductase (DhuD), kinase (KdgK), and aldolase (KdgA)  
83        (15). On the other hand, the bacterial import of GAGs is poorly understood, although several  
84        ABC exporters of GAGs in bacteria (16, 17) and humans (18) have been identified.

85        Streptococci are classified into three groups based on their hemolytic activity:  $\alpha$ , incomplete  
86        lysis of red cells;  $\beta$ , complete lysis of red cells; and  $\gamma$ , lack of hemolysis (19).  $\beta$ -Streptococci are  
87        further classified into A–V groups based on antigenic differences in their cell wall  
88        polysaccharides. For example, group  $\alpha$  *Streptococcus pneumoniae* is a major causative bacterium  
89        of pneumonia, and group  $\beta$ -A *Streptococcus pyogenes* causes pharyngitis and sepsis. Group  $\beta$ -B  
90        *Streptococcus agalactiae* is responsible for neonatal sepsis and meningitis, and is indigenous to

91 the gastrointestinal and urogenital tracts of 25–40% of healthy women. In fact, 50% of neonates  
92 are maternally infected with *S. agalactiae* during delivery, which can lead to neonatal invasive  
93 diseases (20). In *S. pneumoniae* genomes, enzymes for the depolymerization, degradation, and  
94 metabolism of GAGs are encoded together with a putative phosphotransferase system (PTS), a  
95 typical bacterial sugar import system (21). The genes encoding hyaluronate lyase, UGL, DhuI,  
96 DhuD, and the PTS are assembled to form a GAG genetic cluster (Fig. 1B). The similar genetic  
97 cluster is also included in the genome of *S. pyogenes* and *S. agalactiae*.

98 PTS is composed of Enzyme I (EI), histidine-containing phosphocarrier protein (HPr), and  
99 Enzyme II (EII), which has multiple hetero-subunits (EIIA, EIIB, EIIC, and EIID) (22). EI and  
100 HPr proteins are located in the cytoplasm and nonspecifically recognize sugar substrates,  
101 whereas EII is substrate-specific and consists of cell membrane and cytoplasmic domains.  
102 Mechanistically, the PTS imports sugar by phosphorylating the substrate at the C-6 position  
103 through successive phosphotransfer reactions from a phosphate donor (phosphoenolpyruvate)  
104 mediated by EI, HPr, and EII (21). A large number of GAGs (with the exception of hyaluronan)  
105 are frequently sulfated at the C-6 position (23). Unsaturated GAG disaccharides with a sulfate  
106 group at C-6 are unsuitable as PTS substrates due to the lack of phosphorylation. Indeed, after  
107 disruption of the EI gene, *Salmonella typhimurium* still grows on sugars such as glucuronate and  
108 glucose-6-phosphate, indicating that sugars with carboxyl or phosphate group at their C-6

109 position are imported by other transport systems distinct from the PTS (24). Despite the  
110 identification of more than twenty sugars that are imported by the PTS, none are modified at the  
111 C-6 position (25).

112 The PTS is thought to import depolymerized hyaluronan as the presence of hyaluronan  
113 leads to an increase in the expression of the *S. agalactiae* PTS gene (26). Marion *et al.* have  
114 previously shown that the PTS, in conjunction with hyaluronate lyase and UGL, is essential for  
115 the growth of *S. pneumoniae* when hyaluronan is the sole carbon source (27). PTS mutation has  
116 been shown to reduce the ability of the bacteria to colonize mouse upper respiratory tracts.  
117 However, the PTS mutant was found to grow on GlcUA and GlcNAc at the same rate as the  
118 parental wild-type strain; the substrate of the PTS in this case remains to be identified. This study  
119 focused on the role of the *S. agalactiae* PTS in the import of unsaturated hyaluronan  
120 disaccharides.

121

## 122 **RESULTS**

123 **Degradation of GAGs by *S. agalactiae*.** As *S. agalactiae* produces hyaluronate lyase that  
124 depolymerizes both hyaluronan and chondroitin sulfate (28), the halo plate method was used to  
125 investigate streptococcal GAG degradation (Fig. 2A). Chondroitin sulfate is classified into  
126 chondroitin sulfates A, B, and C, based on the position of the sulfate group (29). Chondroitin

127 sulfate C is sulfated at the C-6 position of GalNAc, whereas chondroitin sulfates A and B are  
128 sulfated at the C-4 position. The repeating units of chondroitin sulfates A, B, and C are  
129 GlcUA-GalNAc4S (GalNAc with a sulfate group at the C-4 position), IdoUA-GalNAc4S, and  
130 GlcUA-GalNAc6S (GalNAc with a sulfate group at the C-6 position), respectively (30). Plates  
131 containing the brain heart infusion necessary for streptococcal growth failed to produce the white  
132 precipitate that results from the aggregation of GAGs and bovine serum albumin (BSA) upon the  
133 addition of acetic acid. Accordingly, nutrient medium and horse serum were used as alternatives  
134 for halo plate analysis. In addition to *S. agalactiae* NEM316 (Fig. 1B, upper), *S. agalactiae* JCM  
135 5671 (which contains the GAG genetic cluster; Fig. 1B, lower) was selected to represent a  
136 typical strain that is able to degrade GAG. Moreover, the function of the PTS encoded in the  
137 GAG genetic cluster was characterized through the construction of a NEM316 mutant strain by  
138 replacing the PTS gene segment (a set of EIIB, EIIC, and EIID genes) with a  
139 kanamycin-resistant gene ( $Km^r$ ) (Fig. 3A); the degrading ability of this PTS mutant was then  
140 assessed.

141       Although the GAG genetic cluster of *S. agalactiae* JCM 5671 is divided into two segments  
142 by the insertion of 55 genes between the HMPREF9171\_0332 gene encoding the PTS EIIA and  
143 the HMPREF9171\_0388 gene encoding UGL (Fig. 1B, lower), both strains produced clear halos  
144 on plates containing hyaluronan (Fig. 2A). However, halos were not observed on plates



145 containing chondroitin sulfate A or C, or heparin. This indicates that *S. agalactiae* is active  
146 against hyaluronan, but not the other three GAGs. The lack of chondroitin sulfate A and C  
147 degradation was probably due to a low level of bacterial lyase activity toward chondroitin  
148 sulfates. Similar to the wild-type strain, the PTS mutant exhibited a halo on  
149 hyaluronan-containing plates (but not on those containing the other GAGs), suggesting that the  
150 PTS is not essential for the degradation of hyaluronan.

151 **Assimilation of hyaluronan by *S. agalactiae*.** *S. agalactiae* GD201008-001 has been  
152 shown to use hyaluronan as a sole carbon source for growth (31). In addition, a *S. pneumoniae*  
153 mutant with a disruption of the PTS genes in the GAG genetic cluster was unable to assimilate  
154 hyaluronan (27). Based on these observations, the hyaluronan assimilation of *S. agalactiae*  
155 NEM316 (Fig. 1B, upper) and its PTS mutant was investigated using hyaluronan-containing  
156 minimum medium (Fig. 3B). *S. agalactiae* was found to grow on hyaluronan or glucose, whereas  
157 no growth was apparent on minimum medium that lacked saccharide. In contrast, the PTS  
158 mutant was unable to grow in the hyaluronan-containing minimum medium, indicating that the  
159 PTS encoded in the GAG genetic cluster is crucial for the assimilation of hyaluronan in *S.*  
160 *agalactiae*. In addition, the growth of wild-type cells on hyaluronan-containing media was higher  
161 than that observed in the absence of hyaluronan, whereas the growth of the PTS mutant cells was  
162 unaffected (Fig. S2).

163 As *S. agalactiae* was found to degrade and assimilate hyaluronan, PTS activity was  
164 investigated by the preparation of unsaturated hyaluronan disaccharide using recombinant  
165 bacterial hyaluronate lyase. An overexpression system for *S. agalactiae* hyaluronate lyase was  
166 constructed in *Escherichia coli*, and the cell extract was used to treat hyaluronan. The reaction  
167 product was then purified by gel filtration chromatography (Fig. 2B, upper). The eluted fractions  
168 were subjected to thin-layer chromatography (TLC) (Fig. 2B, lower), and the fractions  
169 containing unsaturated hyaluronan disaccharide at an elution volume of 20–24 ml were collected,  
170 concentrated, and used as the substrate in the PTS assay.

171 **Import of unsaturated hyaluronan disaccharide by *S. agalactiae* PTS.** To demonstrate  
172 the PTS-dependent import of unsaturated hyaluronan disaccharide in *S. agalactiae* NEM316,  
173 PTS-induced pyruvate production from phosphoenolpyruvate was measured using bacterial cells  
174 permeabilized by treatment with toluene (Fig. 4). As *S. pneumoniae* has previously been shown  
175 to incorporate cellobiose via a PTS (32), cellobiose was used as a positive control. In contrast,  
176 D-glucosamine-6-phosphate (GlcN6P) was used as a negative control as phosphorylation at the  
177 C-6 position renders it an unsuitable PTS substrate. Gram-positive *Micrococcus luteus*, which  
178 lacks both the GAG genetic cluster and PTS genes, was also used as a negative control.

179 The growth of *S. agalactiae* both in the presence and absence of hyaluronan led to an  
180 increase in the PTS import of cellobiose (compared to the basal activity measured in the absence

181 of the sugar substrate). This indicates that the bacterial PTS is promoting the uptake of cellobiose  
182 into the cell. In contrast, *S. agalactiae* exhibited no enhanced PTS activity using GlcN6P as a  
183 substrate, regardless of the presence of hyaluronan. These results suggest that permeabilized *S.*  
184 *agalactiae* cells are functionally active, and the assay used is a reliable indicator of PTS activity.  
185 The bacterial cells exhibited a higher level of PTS-mediated cellobiose import when grown in the  
186 presence of hyaluronan; this is probably due to hyaluronan-dependent increases in the  
187 transcriptional level of the PTS genes for import of cellobiose (26). In contrast, *M. luteus*  
188 exhibited similar levels of PTS import of cellobiose as the basal controls; this reflects the lack of  
189 a cellobiose PTS in *M. luteus*. Limited PTS import of GlcN6P was observed in *M. luteus* cells,  
190 which is in agreement with the results from *S. agalactiae*.

191 The levels of the PTS import of unsaturated hyaluronan disaccharide into *S. agalactiae*  
192 grown in the absence and presence of hyaluronan were approximately 1.8 and 2.9 times higher  
193 than basal levels, respectively. These findings represent a significant difference between the PTS  
194 import and basal activity, especially in cells grown in the presence of hyaluronan. On the other  
195 hand, the PTS mutant grown in the absence of hyaluronan showed similar levels of PTS import  
196 of unsaturated hyaluronan disaccharide as the basal controls. This indicates that the mutant lacks  
197 the ability to import unsaturated hyaluronan disaccharide. These results clearly demonstrate that  
198 *S. agalactiae* imports unsaturated hyaluronan disaccharide using the PTS encoded in the GAG

199 genetic cluster.

200 **Structure determination of *S. agalactiae* EIIA.** X-ray crystallography of EIIA<sup>ΔHA</sup> (EIIA  
201 for unsaturated hyaluronan disaccharide; ΔHA) was performed as a first step toward determining  
202 the overall structure of the *S. agalactiae* PTS complex (EIIABCD) for the import of unsaturated  
203 hyaluronan disaccharide. Recombinant purified EIIA<sup>ΔHA</sup> protein was crystallized, and X-ray  
204 diffraction data were collected. Data collection and refinement statistics are shown in Table 1.  
205 The EIIA<sup>ΔHA</sup> crystal belongs to the *P1* group with unit cell dimensions of  $a = 52.3$ ,  $b = 53.8$ , and  
206  $c = 94.9$  Å, and  $\alpha = 91.1$ ,  $\beta = 90.0$ , and  $\gamma = 61.0^\circ$ . The final model, containing six molecules in an  
207 asymmetric unit, was refined to an  $R_{\text{work}}$  of 20.8% up to a resolution of 1.8 Å. Ramachandran  
208 plot analysis indicated 99.0% of residues in the favored regions and 1.00% of residues in the  
209 additional allowed regions. The crystal structure of EIIA<sup>ΔHA</sup> was determined using molecular  
210 replacement with *E. coli* PTS EIIA<sup>man</sup> (PDB ID, 1PDO) for mannose import as the initial model.

211 **Crystal structure of EIIA<sup>ΔHA</sup>.** EIIA<sup>ΔHA</sup> consists of 144 residues, although the 14 residues  
212 (Leu131–Ile144) of the C-terminal could not be assigned due to their structural flexibility. With  
213 respect to the secondary structure of EIIA<sup>ΔHA</sup>,  $\alpha$ -helices,  $\beta$ -sheets, and loops constitute 41.0%,  
214 17.0%, and 42.0%, respectively. EIIA<sup>ΔHA</sup> is composed of six  $\alpha$ -helices ( $\alpha_1$ , Phe12–Ala24;  $\alpha_2$ ,  
215 Ser41–Val52;  $\alpha_3$ , Thr68–Leu76;  $\alpha_4$ , Leu93–Met105;  $\alpha_5$ , Asp110–Glu122; and  $\alpha_6$ , Phe127–  
216 Thr129), five  $\beta$ -strands ( $\beta_1$ , Lys3–His9;  $\beta_2$ , Val30–Phe35;  $\beta_3$ , Glu57–Thr62;  $\beta_4$ , Lys84–Ser89;

217 and  $\beta$ 5, Val125–Asp126), and ten loops (L1, Met1–Ile2; L2, Gly10–Asn11; L3, Gly25–Tyr29;  
218 L4, Ile36–Ser40; Ile53–Lys56; L5, Asp63–Gly67; L6, Ser77–Lys83; L7, Gly90–Asn92; L8,  
219 Phe106–Val109; L9, Gly123–Ile124; and L10, Cys130). In the overall structure, a parallel  
220  $\beta$ -sheet containing four  $\beta$ -strands ( $\beta$ 1,  $\beta$ 2,  $\beta$ 3, and  $\beta$ 4) is located at the center, and two ( $\alpha$ 2 and  
221  $\alpha$ 3) and three  $\alpha$ -helices ( $\alpha$ 1,  $\alpha$ 4, and  $\alpha$ 5) are located so they pinch the  $\beta$ -sheet from both sides,  
222 resulting in the formation of a Rossmann-fold frame (Fig. 5A).  $\beta$ 1–4 and  $\alpha$ 1–4 are alternately  
223 arranged and  $\alpha$ 4 is followed by  $\alpha$ 5 then  $\beta$ 5. Gel filtration chromatography suggested that  
224 EIIA<sup>ΔHA</sup> was smaller than a tetramer, and the biological asymmetric unit was shown to be a  
225 dimer using *PISA* software (33). In the dimer, the C-terminal  $\beta$ 5s in adjacent monomers are  
226 arranged to align with mutual  $\beta$ 4s, and added to the parallel  $\beta$ -sheet located at the center of the  
227 monomer, forming an antiparallel  $\beta$ -sheet.

228

## 229 **DISCUSSION**

230 The ability of *S. agalactiae* to degrade and assimilate hyaluronan allows the measurement  
231 of PTS import activity using an unsaturated disaccharide derived from hyaluronan degradation.  
232 The PTS import of unsaturated hyaluronan disaccharide in bacterial wild-type cells grown in the  
233 absence of hyaluronan was significantly higher than in controls using no substrate or GlcN6P;  
234 this indicates that *S. agalactiae* incorporates unsaturated hyaluronan disaccharide via a PTS. On

235 the other hand, PTS mutant cells grown in the absence of hyaluronan were unable to incorporate  
236 unsaturated hyaluronan disaccharide. Based on these observations and the fact that PTS mutant  
237 failed to grow on hyaluronan-containing minimum medium, we conclude that the PTS encoded  
238 in the GAG genetic cluster is the sole importer of unsaturated hyaluronan disaccharide in *S.*  
239 *agalactiae*.

240 Surprisingly, the PTS mutant grown in the presence of hyaluronan exhibited enhanced PTS  
241 import of unsaturated hyaluronan disaccharide, in comparison with the control. Furthermore, the  
242 levels of PTS import of unsaturated hyaluronan disaccharide and cellobiose in bacterial  
243 wild-type cells grown in the presence of hyaluronan, were approximately 1.6 and 2.3 times  
244 higher than those in the absence of hyaluronan, respectively. Based on these observations, we  
245 hypothesize that hyaluronan present in the cultured medium damages growing *S. agalactiae* cells,  
246 and the subsequent toluene-treatment causes leakage of cytoplasmic enzymes such as UGL and  
247  $\beta$ -glucosidase. As a result, the unsaturated hyaluronan disaccharide and cellobiose contained in  
248 the reaction mixtures are degraded by these enzymes to the constituent monosaccharides  
249 (unsaturated GlcUA, GlcNAc, and glucose), and incorporated by another PTS.

250 While bacterial cells import sugars through various mechanisms such as facilitated diffusion,  
251 primary and secondary active transport, and group translocation, the PTS is the major sugar  
252 import pathway in many species (34, 35). PTS Enzyme II is classified into four families based on

253 its primary structure: (i) the glucose-fructose-lactose family; (ii) the ascorbate-galactitol family;  
254 (iii) the mannose family; and (iv) the dihydroxyacetone family (36). Several characteristic  
255 features of the mannose family have been defined. These include the observations that EIIC is a  
256 hetero (not a homo)-membrane domain in combination with EIID, an EIIB receives a phosphate  
257 group from a histidine rather than a cysteine residue, and various sugars can be used as a  
258 substrate. *S. agalactiae* EIIA<sup>ΔHA</sup> showed the most similarity with *E. coli* mannose EIIA (PDB ID,  
259 1PDO), *Enterococcus faecalis* gluconate EIIA (PDB ID, 3IPR), and *Thermoanaerobacter*  
260 *tengcongensis* mannose/fructose EIIA (PDB ID, 3LFH), all of which belong to the mannose  
261 family; Z-scores, estimated by the Dali program (37), were 20.2, 19.9, and 19.1, respectively  
262 (Figs. 5B and C) (Table S1). Based on the well-conserved characteristics of the mannose family,  
263 the *S. agalactiae* PTS for the import of unsaturated hyaluronan disaccharide appears to be a  
264 member of this family. The three-dimensional structures of these enzymes were well  
265 superimposed (Fig. 5B). *S. agalactiae* EIIB<sup>ΔHA</sup> was homology modeled by the SWISS-MODEL  
266 using putative *S. pyogenes* EIIB for the import of GalNAc (PDB ID, 3P3V) (sequence identity:  
267 70%) as a template (38). *S. agalactiae* EIIB<sup>ΔHA</sup> is composed of an antiparallel β-sheet of eight  
268 β-strands, and eight α-helices (Fig. 5D). The three-dimensional structures of *E. coli* HPr-EIIA<sup>Man</sup>  
269 and EIIA<sup>Man</sup>-EIIB<sup>Man</sup> complexes (previously determined using NMR), and EIIA<sup>Man</sup>, have also  
270 been found to form a dimer (39, 40). In HPr-EIIA<sup>Man</sup> and EIIA<sup>Man</sup>-EIIB<sup>Man</sup> complexes, His10 of

271 EIIA<sup>Man</sup> is an important residue in the transfer of a phosphate group from HPr to EIIB<sup>Man</sup>,  
272 through EIIA<sup>Man</sup> (41). Due to the similarity between the interaction sites of EIIA<sup>Man</sup> with HPr,  
273 and EIIA<sup>Man</sup> with EIIB<sup>Man</sup>, HPr or EIIB<sup>Man</sup> must be separated while the other remains bound to  
274 EIIA<sup>Man</sup>. The His10 of EIIA<sup>Man</sup> is also conserved in EIIA<sup>ΔHA</sup> with His9 (Fig. 5C). To compare  
275 EIIA<sup>ΔHA</sup>-EIIB<sup>ΔHA</sup> and EIIA<sup>Man</sup>-EIIB<sup>Man</sup>, the EIIA<sup>ΔHA</sup> dimer and EIIB<sup>ΔHA</sup> monomer were  
276 superimposed with the EIIA<sup>Man</sup>-EIIB<sup>Man</sup> complex. The arrangements of the His9 of EIIA<sup>ΔHA</sup> and  
277 His10 of EIIA<sup>Man</sup> almost corresponded to each other; this was also observed with the His18 of  
278 EIIB<sup>ΔHA</sup> and His18 of EIIB<sup>Man</sup>. His9 of EIIA<sup>ΔHA</sup> is located at the end of β1 and interacts with  
279 Asp63 via hydrogen bonding, and with Phe12, Phe35, Asp63, Gly67, and Pro69 through van der  
280 Waals contacts. These amino acid residues are almost conserved in EIIA for mannose (including  
281 *E. coli* EIIA<sup>Man</sup>). Therefore, His9 of EIIA<sup>ΔHA</sup> appears to be crucial in the transfer of a phosphate  
282 group.

283 In this study, *S. agalactiae* was found to import unsaturated hyaluronan disaccharide  
284 through the PTS encoded in the GAG genetic cluster. Unlike other sulfated GAGs, hyaluronan  
285 contains no sulfate groups at the C-6 position of its constituent monosaccharides. Thus,  
286 unsaturated hyaluronan disaccharide is a suitable substrate for the PTS through the transfer of a  
287 phosphate group to the C-6 position. We have recently identified a solute-binding  
288 protein-dependent ABC transporter in Gram-negative *Streptobacillus moniliformis* that acts as an



289 importer of unsaturated GAG disaccharides (42, 43) (Fig. S3). Bacterial ABC transporters  
290 generally receive substrates from solute-binding proteins and incorporate the substrates into the  
291 cytoplasm using the energy of ATP hydrolysis (44). Because the imported substrates of the ABC  
292 transporter have no modifications that render them distinct from PTS substrates, *S. moniliformis*  
293 ABC transporter has been demonstrated to import both sulfated and non-sulfated unsaturated  
294 GAG disaccharides derived from chondroitin sulfate and hyaluronan. Furthermore, genes  
295 homologous with *S. moniliformis* ABC transporter genes are conserved among the genome of  
296 several fusobacterial species, which are generally indigenous to animal oral cavities.  
297 Fusobacterium probably utilizes the ABC transporter for the assimilation of sulfated GAGs that  
298 are abundant in the oral cavities. On the other hand, *S. agalactiae*, a pathogen of the  
299 hyaluronan-rich vaginal mucosa (45, 46), is thought to utilize the PTS to assimilate vaginal  
300 hyaluronan. Streptococci, and several intestinal probiotics such as *Lactobacillus rhamnosus* and  
301 *E. faecalis*, possess the genes homologous with the PTS (47), indicating that the import system  
302 may be common to the intestinal bacteria that are able to use GAGs.

303 In conclusion, this is the first report that confirms *S. agalactiae* PTS encoded in the GAG  
304 genetic cluster is the importer of non-sulfated unsaturated hyaluronan disaccharides distinct from  
305 sulfated GAG-fragments.

306

307 **MATERIALS AND METHODS**

308 **Materials.** Hyaluronan sodium salt was purchased from Sigma Aldrich. Sodium salts of  
309 chondroitin sulfates A and C were obtained from Wako Pure Chemical Industries, and heparin  
310 sodium salt from Nacalai Tesque. A thermosensitive suicide vector, pSET4s, was kindly provided  
311 by Dr. Takamatsu (National Agriculture and Food Research Organization).

312 **Micoorganisms and culture conditions.** *S. agalactiae* NEM316 (ATCC 12403) was  
313 purchased from Institute Pasteur, and *S. agalactiae* JCM 5671 (ATCC 13813) from Riken  
314 BioResource Center. *S. agalactiae* cells were statically grown at 37°C under 5% CO<sub>2</sub> in 3.7%  
315 brain heart infusion medium (BD Bacto) or 0.8% nutrient medium (0.3% beef extract and 0.5%  
316 peptone) (Difco), supplemented with 20% horse serum for 16–24 h. To investigate hyaluronan  
317 assimilation by *S. agalactiae*, hyaluronan-containing minimum medium was prepared as  
318 described previously (48). Briefly, streptococcal cells in logarithmic phase of growth were  
319 inoculated (to an optical density of 0.01 at 600 nm; OD<sub>600</sub>) into minimum medium consisting of  
320 0.44 g/l KH<sub>2</sub>PO<sub>4</sub>, 0.3 g/l K<sub>2</sub>HPO<sub>4</sub>, 3.15 g/l Na<sub>2</sub>HPO<sub>4</sub>, 2.05 g/l NaH<sub>2</sub>PO<sub>4</sub>, 0.225 g/l sodium citrate,  
321 6 g/l sodium acetate, 0.6 g/l (NH<sub>4</sub>)<sub>2</sub>SO<sub>4</sub>, 0.2 g/l MgSO<sub>4</sub>, 10 mg/l NaCl, 10 mg/l FeSO<sub>4</sub>, 10 mg/l  
322 MnSO<sub>4</sub>, 0.4 mg/l riboflavin, 0.01 mg/l biotin, 0.1 mg/l folate, 0.8 mg/l pantothenate, 0.4 mg/l  
323 thiamine, 2 mg/l nicotinamide, 0.8 mg/l pyridoxamine, 0.1 mg/l *p*-aminobenzoate, 5 mg/l Gln,  
324 300 mg/l Glu, 110 mg/l Lys, 100 mg/l Asp, 100 mg/l Ile, 100 mg/l Leu, 100 mg/l Met, 100 mg/l

325 Ser, 100 mg/l Phe, 100 mg/l Thr, 100 mg/l Val, 200 mg/l Ala, 200 mg/l Arg, 200 mg/l Cys, 200  
326 mg/l His, 200 mg/l Gly, 400 mg/l Pro, 200 mg/l Trp, 200 mg/l Tyr, 35 mg/l adenine and 30 mg/l  
327 uracil, in the presence of 0.5% hyaluronan or 2% glucose, or in the absence of sugar substrate.  
328 The bacterial cells were grown at 37°C and turbidity monitored periodically.

329 *E. coli* DH5 $\alpha$  harboring plasmids were cultured at 37°C in Luria-Bertani (LB) medium  
330 containing 100  $\mu$ g/ml sodium ampicillin. For the expression of recombinant proteins, *E. coli*  
331 BL21(DE3) harboring plasmids were cultured at 30°C in LB medium containing 100  $\mu$ g/ml  
332 sodium ampicillin to an OD<sub>600</sub> of 0.3–0.7, followed by the addition of  
333 isopropyl- $\beta$ -D-thiogalactopyranoside to a final concentration of 0.1 mM, and further incubation  
334 at 16°C for 2 days.

335 **Halo detection for GAG degradation.** The halo detection method was used to  
336 investigate the GAG-degrading ability of *S. agalactiae*. The bacterial cells were grown on plates  
337 containing 0.2% dialyzed GAG (hyaluronan, chondroitin sulfate A, C, or heparin), 0.8% nutrient  
338 medium, 20% horse serum, and 1% BSA solidified with 1% agar. When sufficient bacterial  
339 growth was achieved, the addition of 2 M acetic acid (1 ml) to the plates resulted in the  
340 formation of a white precipitate due to the interaction of GAGs and BSA; areas containing  
341 degraded GAGs appear as clear zones or “halos.”

342 **Construction of an overexpression system.** An overexpression system for *S. agalactiae*

343 hyaluronate lyase was constructed in *E. coli* as a source of enzymes for the preparation of  
344 unsaturated hyaluronan disaccharide required for the PTS import assay. To clone the gbs1270  
345 gene that encodes hyaluronate lyase, polymerase chain reaction (PCR) was conducted on 10  $\mu$ l of  
346 reaction mixture consisting of 0.2 U of KOD Plus Neo polymerase (Toyobo), *S. agalactiae* as a  
347 template, 0.3 pmol of each of forward and reverse primers, 2 nmol of dNTPs, 10 nmol of MgCl<sub>2</sub>,  
348 0.5  $\mu$ l of dimethyl sulfoxide, and the commercial reaction buffer supplied with KOD Plus Neo  
349 polymerase. PCR conditions were as follows: 94°C for 2 min followed by 30 cycles of 98°C for  
350 10 s, 35°C for 30 s, and 68°C for 2 min. The PCR product was ligated to *Hinc*II-digested  
351 pUC119 (Takara Bio) using Ligation High Ver. 2 (Toyobo), and the resulting plasmid was  
352 digested with *Nco*I and *Xho*I to isolate the gbs1270 gene. The gene fragment was confirmed to  
353 encode the correct gbs1270 by DNA sequencing (49). The *Nco*I and *Xho*I-digested gbs1270 gene  
354 was ligated into *Nco*I and *Xho*I-digested pET21d (Novagen), and *E. coli* BL21(DE3) host cells  
355 were transformed with the resulting plasmid, pET21d-gbs1270. An overexpression system of *S.*  
356 *agalactiae* EIIA<sup>ΔHA</sup> was also constructed in *E. coli* for X-ray crystallography. To clone the  
357 gbs1890 gene encoding EIIA<sup>ΔHA</sup>, PCR was performed using primers specific for EIIA<sup>ΔHA</sup> as  
358 described above. The gene fragment was ligated into *Nde*I and *Xho*I-digested pET21b (Novagen),  
359 and *E. coli* BL21(DE3) host cells were transformed with the plasmid pET21b-gbs1890. The PCR  
360 primers used are shown in Table 2.

361       **Construction of the PTS mutant.**     The PTS mutant was constructed using Km<sup>r</sup> and the  
362 thermosensitive suicide vector, pSET4s. The gbs1886-1887-1888 operon gene coding for PTS  
363 EIID, EIIC, and EIIB was amplified by PCR using *S. agalactiae* as a template, and the PCR  
364 product was ligated with *Hinc*II-digested pSET4s. Using the pSET4s-gbs1886-1887-1888  
365 plasmid as a template, inverse PCR was conducted to amplify lineared PCR product to remove  
366 the PTS operon gene excepting the both ends of 500 bp for homologous recombination. The  
367 lineared product of inverse PCR was ligated with pUC4K-derived Km<sup>r</sup>. The resulting plasmid  
368 was designed as pSET4s-gbs1886-1887-1888::Km<sup>r</sup>.

369       To transform the pSET4s-gbs1886-1887-1888::Km<sup>r</sup> plasmid into the streptococcal cells,  
370 electrotransformation was conducted as previously described, but with a slight modification (50).  
371 Briefly, *S. agalactiae* NEM316 was grown in 50 ml brain heart infusion medium containing  
372 0.4% glucose to an OD<sub>600</sub> of 0.3, harvested by centrifugation at 2,610 g at 4°C for 10 min, and  
373 washed three times with 15 ml of 10% cold glycerol. The washed cells were suspended in 1 ml  
374 of 20% cold glycerol and aliquoted into 50 µl samples. Following the addition of 1 µg of the  
375 plasmid (1 µg/µl) and incubation on ice for 1 min, the competent cells were transferred to a cold  
376 electroporation cuvette with a 0.1 cm gap (Bio-Rad). The cuvette was set to MicroPulser  
377 (Bio-Rad) and pulsed as follows: field strength, 1.8 kV; capacitor, 10 µF; and resistor, 600 Ω.  
378 Brain heart infusion medium containing 10% glycerol (1 ml) was immediately and gently added

379 to the cuvette. After incubation at 28°C for 1 h, the electroporated cells were spread on a brain  
380 heart infusion plate containing 250 µg/ml spectinomycin, and further incubated at 28°C for 3 d to  
381 obtain a spectinomycin-resistant transformant. The single crossover mutant cells obtained were  
382 transferred to medium without spectinomycin and subcultured repeatedly at 37°C. A  
383 spectinomycin-sensitive and kanamycin-resistant (500 µg/ml) single colony was considered to be  
384 double crossover mutant.

385 **Protein purification.** Recombinant *E. coli* cells were harvested by centrifugation at 6,700  
386 g at 4°C for 10 min and suspended in 20 mM Tris (hydroxymethyl) aminomethane-hydrochloride  
387 (Tris-HCl), pH 7.5. The cell suspension was ultrasonicated (Insonator Model 201M, Kubota) at  
388 0°C and 9 kHz for 10 min, and subjected to centrifugation at 20,000 g at 4°C for 20 min. The  
389 supernatant cell extract was then used in subsequent experiments. The  
390 BL21(DE3)/pET21d-gbs1270 cell extract was used as a source of hyaluronate lyase for the  
391 preparation of unsaturated hyaluronan disaccharide. EIIA<sup>ΔHA</sup> was purified from  
392 BL21(DE3)/pET21b-gbs1890 cell extract using metal affinity [TALON (Clontech)] and gel  
393 filtration chromatography [Sephacryl S-200 (GE Healthcare)]. After the confirmation of protein  
394 purity by sodium dodecyl sulfate-polyacrylamide gel electrophoresis (SDS-PAGE), the purified  
395 protein was dialyzed against 20 mM Tris-HCl (pH 7.5).

396 **Preparation of unsaturated hyaluronan disaccharide.** To investigate PTS import

397 activity, unsaturated hyaluronan disaccharide was prepared using recombinant hyaluronate lyase.  
398 A reaction mixture containing BL21(DE3)/pET21d-gbs1270 cell extract, 0.2% hyaluronan, and  
399 20 mM Tris-HCl (pH 7.5) was incubated at 30°C for 2 days. The mixture was then boiled to stop  
400 the reaction and centrifuged at 20,000 g for 20 min to remove aggregated proteins. The resulting  
401 supernatant was concentrated by freeze-drying and subjected to gel filtration chromatography  
402 [Superdex Peptide 10/300 GL (GE Healthcare)]. The eluted fractions containing unsaturated  
403 hyaluronan disaccharide were identified by monitoring the absorbance (235 nm) from the C=C  
404 double bonds of the disaccharide. To confirm the presence of unsaturated hyaluronan  
405 disaccharide, pooled fractions were subjected to TLC using a solvent system of 1-butanol:acetic  
406 acid:water (3:2:2, v:v:v), and hyaluronan breakdown products were visualized by heating the  
407 TLC plates [silica gel 60 F<sub>254</sub> (Merck)] at 130°C for 5 min after spraying with ethanol containing  
408 10% sulfuric acid. The final disaccharide preparation was freeze-dried and dissolved in sterilized  
409 water to a final concentration of 200 mM.

410 **PTS assay.** The import of unsaturated hyaluronan disaccharides into *S. agalactiae* via the  
411 PTS was evaluated by quantifying the pyruvate produced from phosphoenolpyruvate during the  
412 import process, as described previously but with a few modifications (34, 51). The reaction  
413 mixture contained cells whose cell-surface layer had been permeabilized with toluene,  
414 phosphoenolpyruvate, disaccharides, NADH, and L-lactate dehydrogenase from rabbit muscle

415 (Oriental Yeast). The reaction was monitored through measurements of absorbance at 340 nm to  
416 determine levels of NADH oxidation resulting from the production of lactate from the pyruvate  
417 generated by the PTS process. Briefly, *S. agalactiae* wild-type and PTS mutant cells were grown  
418 at 37°C under 5% CO<sub>2</sub> for 16 h in 0.8% nutrient medium and 20% horse serum, in the presence  
419 or absence of 0.2% dialyzed hyaluronan, and then harvested by centrifugation at 2,610 g at 4°C  
420 for 5 min. The cells were washed twice with 5 mM MgCl<sub>2</sub> and 0.1 M potassium phosphate buffer  
421 (KPB); pH 7.2, and suspended in 1 ml of the same buffer containing 50 µl of acetone:toluene  
422 (9:1, v:v) by vortexing twice for 2 min. The reaction mixture containing toluene-treated cells, 10  
423 mM sugar, 0.1 mM NADH, 0.023 mg/ml L-lactate dehydrogenase, 10 mM NaF, 5 mM MgCl<sub>2</sub>,  
424 and 0.1 M KPB (pH 7.5) was incubated at 37°C for 5 min, and phosphoenolpyruvate then added  
425 to a concentration of 5 mM. The reaction was monitored by measuring the decrease in  
426 absorbance at 340 nm. The protein concentration of toluene-treated cells was determined using  
427 the bicinchoninic acid (BCA) assay (52). The PTS import activity value was calculated as the  
428 amount of pyruvate produced (nmol/min/mg).

429 **X-ray crystallography.** To determine the three-dimensional structure of *S. agalactiae*  
430 EIIA<sup>ΔHA</sup>, the purified protein was concentrated to 9.24 mg/ml and crystallized using the sitting  
431 drop vapor diffusion method. The purified EIIA<sup>ΔHA</sup> (1 µl) was mixed with an equal volume of a  
432 reservoir solution consisting of 20% (w/v) polyethylene glycol (PEG) 3,350 and 0.2 M sodium



433 thiocyanate (pH 6.9), and incubated at 20°C. The crystal was picked up from the drop with a  
434 nylon loop, soaked in reservoir solution containing 20% glycerol as a cryoprotectant, and  
435 instantaneously frozen in liquid nitrogen. X-ray diffraction data were collected at the BL38B1  
436 station of SPring-8 (Hyogo, Japan). The data were indexed, integrated, and scaled using  
437 *HKL2000* software (53). The structure was determined through the molecular replacement  
438 method using *Molrep* in the *CCP4* software package and *E. coli* PTS EIIA (PDB ID, 1PDO) for  
439 mannose import (54). Structure refinement was conducted with *phenix refine* in *PHENIX*  
440 software (55). The model was refined manually with *winCoot* software (56). Protein structures  
441 were prepared using the *PyMOL* (57).

## ACKNOWLEDGMENTS

We thank Dr. Daisuke Takamatsu, National Agriculture and Food Research Organization, for kindly supplying a thermosensitive suicide vector, pSET4s. We thank Ms. Ai Matsunami for her excellent technical assistance. We thank Drs. S. Baba and N. Mizuno of the Japan Synchrotron Radiation Research Institute (JASRI) for their kind help in data collection. Diffraction data were collected at the BL38B1 line of SPring-8 (Hyogo, Japan) with the approval of (Projects 2012A1317 and 2016B2574). This work was supported in part by Grants-in-Aid Scientific Research from the Japan Society for the Promotion of Science (to W. H.), and the Targeted

Proteins Research Program (to W. H.) from the Ministry of Education, Culture, Sports, Science, and Technology (MEXT) of Japan, and Research Grants (to W. H.) from Yakult Bio-science Foundation. The authors would like to thank Enago ([www.enago.com](http://www.enago.com)) for the English language review.

## FOOTNOTES

Supplemental material for this article may be found at xxxxx.

## REFERENCES

1. Frantz C, Stewart KM, Weaver VM. 2010. The extracellular matrix at a glance. *J Cell Sci* 123:4195-4200.
2. Kamhi E, Joo EJ, Dordick JS, Linhardt RJ. 2013. Glycosaminoglycans in infectious disease. *Biol Rev* 88:928-943.
3. Gandhi NS, Mancera RL. 2008. The structure of glycosaminoglycans and their interactions with proteins. *Chem Biol Drug Des* 72:455-482.
4. Scott JE. 1992. Supramolecular organization of extracellular matrix glycosaminoglycans, *in vitro* and in the tissues. *FASEB J* 6:2639-2645.

5. Prydz K, Dalen KT. 2000. Synthesis and sorting of proteoglycans. *J Cell Sci* 113:193-205.
6. Sawitzky D. 1996. Protein-glycosaminoglycan interactions: infectiological aspects. *Med Microbiol Immun* 184:155-161.
7. Jedrzejewski MJ. 2001. Pneumococcal virulence factors: structure and function. *Microbiol Mol Biol Rev* 65:187-207.
8. Stern R, Jedrzejewski MJ. 2006. Hyaluronidases: their genomics, structures, and mechanisms of action. *Chem Rev* 106:818-839.
9. Jedrzejewski M. 2007. Unveiling molecular mechanisms of bacterial surface proteins: *Streptococcus pneumoniae* as a model organism for structural studies. *Cell Mol Life Sci* 64:2799-2822.
10. Li S, Jedrzejewski MJ. 2001. Hyaluronan binding and degradation by *Streptococcus agalactiae* hyaluronate lyase. *J Biol Chem* 276:41407-41416.
11. Ibberson CB, Jones CL, Singh S, Wise MC, Hart ME, Zurawski DV, Horswill AR. 2014. *Staphylococcus aureus* hyaluronidase is a CodY-regulated virulence factor. *Infect Immun* 82:1710-1714.
12. Hashimoto W, Kobayashi E, Nankai H, Sato N, Miya T, Kawai S, Murata K. 1999.

- Unsaturated glucuronyl hydrolase of *Bacillus* sp. GL1: novel enzyme prerequisite for metabolism of unsaturated oligosaccharides produced by polysaccharide lyases. Arch Biochem Biophys 368:367-374.
13. Itoh T, Hashimoto W, Mikami B, Murata K. 2006. Crystal structure of unsaturated glucuronyl hydrolase complexed with substrate molecular insights into its catalytic reaction mechanism. J Biol Chem 281:29807-29816.
  14. Nakamichi Y, Maruyama Y, Mikami B, Hashimoto W, Murata K. 2011. Structural determinants in streptococcal unsaturated glucuronyl hydrolase for recognition of glycosaminoglycan sulfate groups. J Biol Chem 286:6262-6271.
  15. Maruyama Y, Oiki S, Takase R, Mikami B, Murata K, Hashimoto W. 2015. Metabolic fate of unsaturated glucuronic/iduronic acids from glycosaminoglycans: molecular identification and structure determination of streptococcal isomerase and dehydrogenase. J Biol Chem 290:6281-6292.
  16. Ouskova G, Spellerberg B, Prehm P. 2004. Hyaluronan release from *Streptococcus pyogenes*: export by an ABC transporter. Glycobiology 14:931-938.
  17. Cress BF, Englaender JA, He W, Kasper D, Linhardt RJ, Koffas MA. 2014. Masquerading microbial pathogens: capsular polysaccharides mimic host-tissue

- molecules. FEMS Microbiol Rev 38:660-697.
18. Schulz T, Schumacher U, Prehm P. 2007. Hyaluronan export by the ABC transporter MRP5 and its modulation by intracellular cGMP. J Biol Chem 282:20999-21004.
  19. Patterson MJ. 1996. Streptococcus. Chapter 13 In: Baron, S., editor. Medical Microbiology. 4 th edition. Galveston (TX): University of Texas Medical Branch at Galveston.
  20. Glaser P, Rusniok C, Buchrieser C, Chevalier F, Frangeul L, Msadek T, Zouine M, Couve E, Lalioui L, Poyart C. 2002. Genome sequence of *Streptococcus agalactiae*, a pathogen causing invasive neonatal disease. Mol Microbiol 45:1499-1513.
  21. Deutscher J, Ake FMD, Derkaoui M, Zebre AC, Cao TN, Bouraoui H, Kentache T, Mokhtari A, Milohanic E, Joyet P. 2014. The bacterial phosphoenolpyruvate:carbohydrate phosphotransferase system: regulation by protein phosphorylation and phosphorylation-dependent protein-protein interactions. Microbiol Mol Biol Rev 78:231-256.
  22. Postma P, Lengeler J. 1985. Phosphoenolpyruvate:carbohydrate phosphotransferase system of bacteria. Microbiol Rev 49:232-269.
  23. Habuchi O. 2000. Diversity and functions of glycosaminoglycan sulfotransferases.

Biochimica et Biophysica Acta (BBA)-General Subjects 1474:115-127.

24. Simoni RD, Levinthal M, Kundig FD, Kundig W, Anderson B, Hartman PE, Roseman S. 1967. Genetic evidence for the role of a bacterial phosphotransferase system in sugar transport. *Proc Natl Acad Sci U S A* 58:1963-1970.
25. Barabote RD, Saier MH. 2005. Comparative genomic analyses of the bacterial phosphotransferase system. *Microbiol Mol Biol Rev* 69:608-634.
26. Maruyama Y, Nakamichi Y, Itoh T, Mikami B, Hashimoto W, Murata K. 2009. Substrate specificity of streptococcal unsaturated glucuronyl hydrolases for sulfated glycosaminoglycan. *J Biol Chem* 284:18059-18069.
27. Marion C, Stewart JM, Tazi MF, Burnaugh AM, Linke CM, Woodiga SA, King SJ. 2012. *Streptococcus pneumoniae* can utilize multiple sources of hyaluronic acid for growth. *Infect Immun* 80:1390-1398.
28. Baker JR, Hao Y, Morrison K, Averett WF, Pritchard DG. 1997. Specificity of the hyaluronate lyase of group-B streptococcus toward unsulphated regions of chondroitin sulphate. *Biochem J* 327:65-71.
29. Foot M, Mulholland M. 2005. Classification of chondroitin sulfate A, chondroitin sulfate C, glucosamine hydrochloride and glucosamine 6 sulfate using chemometric techniques.

- J Pharm Biomed Anal 38:397-407.
30. Mathews MB, Inouye M. 1961. The determination of chondroitin sulfate C-type polysaccharides in mixture with other acid mucopolysaccharides. *Biochim Biophys Acta* 53:509-513.
  31. Wang Z, Guo C, Xu Y, Liu G, Lu C, Liu Y. 2014. Two novel functions of hyaluronidase from *Streptococcus agalactiae* are enhanced intracellular survival and inhibition of proinflammatory cytokine expression. *Infect Immun* 82:2615-2625.
  32. Shafeeq S, Kloosterman TG, Kuipers OP. 2011. CelR-mediated activation of the cellobiose-utilization gene cluster in *Streptococcus pneumoniae*. *Microbiology* 157:2854-2861.
  33. Krissinel E, Henrick K. 2007. Protein interfaces, surfaces and assemblies service PISA at European Bioinformatics Institute. *J Mol Biol* 372:774-797.
  34. Kornberg HL, Reeves RE. 1972. Inducible phosphoenolpyruvate-dependent hexose phosphotransferase activities in *Escherichia coli*. *Biochem J* 128:1339-1344.
  35. Saier Jr MH. 1977. Bacterial phosphoenolpyruvate:sugar phosphotransferase systems: structural, functional, and evolutionary interrelationships. *Bacteriol Rev* 41:856-871.
  36. Saier M, Hvorup R, Barabote R. 2005. Evolution of the bacterial phosphotransferase

- system: from carriers and enzymes to group translocators. *Biochem Soc Trans* 33:220-224.
37. Holm L, Rosenstrom P. 2010. Dali server: conservation mapping in 3D. *Nucleic Acids Res* 38:W545-W549.
38. Waterhouse A, Bertoni M, Bienert S, Studer G, Tauriello G, Gumienny R, Heer FT, de Beer TAP, Rempfer C, Bordoli L. 2018. SWISS-MODEL: homology modelling of protein structures and complexes. *Nucleic Acids Res* 46:W296-W303.
39. Williams DC, Cai M, Suh J, Peterkofsky A, Clore GM. 2005. Solution NMR structure of the 48-kDa IIA<sup>Mannose</sup>-HPr complex of the *Escherichia coli* mannose phosphotransferase system. *J Biol Chem* 280:20775-20784.
40. Hu J, Hu K, Williams DC, Komlos ME, Cai M, Clore GM. 2008. Solution NMR structures of productive and non-productive complexes between the A and B domains of the cytoplasmic subunit of the mannose transporter of the *Escherichia coli* phosphotransferase system. *J Biol Chem* 283:11024-11037.
41. Nunn RS, Markovic-Housley Z, Genovesio-Taverne J-C, Flukiger K, Rizkallah PJ, Jansonius JN, Schirmer T, Erni B. 1996. Structure of the IIA domain of the mannose transporter from *Escherichia coli* at 1.7 Å resolution. *J Mol Biol* 259:502-511.



42. Oiki S, Mikami B, Maruyama Y, Murata K, Hashimoto W. 2017. A bacterial ABC transporter enables import of mammalian host glycosaminoglycans. *Sci Rep* 7:1069.
43. Oiki S, Kamochi R, Mikami B, Murata K, Hashimoto W. 2017. Alternative substrate-bound conformation of bacterial solute-binding protein involved in the import of mammalian host glycosaminoglycans. *Sci Rep* 7:17005.
44. Davidson AL, Chen J. 2004. ATP-binding cassette transporters in bacteria. *Annu Rev Biochem* 73:241-268.
45. Edelstam G, Lundkvist OE, Wells AF, Laurent TC. 1991. Localization of hyaluronan in regions of the human female reproductive tract. *J Histochem Cytochem* 39:1131-1135.
46. Lev-Sagie A, Nyirjesy P, Tarangelo N, Bongiovanni AM, Bayer C, Linhares IM, Giraldo PC, Ledger WJ, Witkin SS. 2009. Hyaluronan in vaginal secretions: association with recurrent vulvovaginal candidiasis. *Am J Obstet Gynecol* 201:206. e201-205.
47. Kawai K, Kamochi R, Oiki S, Murata K, Hashimoto W. 2018. Probiotics in human gut microbiota can degrade host glycosaminoglycans. *Sci Rep* 8:10674.
48. Terleckyj B, Willett N, Shockman G. 1975. Growth of several cariogenic strains of oral streptococci in a chemically defined medium. *Infect Immun* 11:649-655.
49. Sanger F, Nicklen S, Coulson AR. 1977. DNA sequencing with chain-terminating

- inhibitors. *Proc Natl Acad Sci U S A* 74:5463-5467.
50. Ricci ML, Manganelli R, Berneri C, Orefici G, Pozzi G. 1994. Electrotransformation of *Streptococcus agalactiae* with plasmid DNA. *FEMS Microbiol Lett* 119:47-52.
  51. Moyer ZD, Burne RA, Zeng L. 2014. Uptake and metabolism of *N*-acetylglucosamine and glucosamine by *Streptococcus mutans*. *Appl Environ Microbiol* 80:5053-5067.
  52. Smith PK, Krohn RI, Hermanson G, Mallia A, Gartner F, Provenzano M, Fujimoto E, Goeke N, Olson B, Klenk D. 1985. Measurement of protein using bicinchoninic acid. *Anal Biochem* 150:76-85.
  53. Otwinowski Z, Minor W. 1997. Processing of X-ray diffraction data collected in oscillation mode. *Meth Enzymol* 276:307-326.
  54. Vagin A, Teplyakov A. 1997. MOLREP: an automated program for molecular replacement. *J App Crystallog* 30:1022-1025.
  55. Adams PD, Afonine PV, Bunkoczi G, Chen VB, Davis IW, Echols N, Headd JJ, Hung L-W, Kapral GJ, Grosse-Kunstleve RW. 2010. PHENIX: a comprehensive Python-based system for macromolecular structure solution. *Acta Crystallogr Sect D: Cryst Struct Commun* 66:213-221.
  56. Emsley P, Lohkamp B, Scott WG, Cowtan K. 2010. Features and development of Coot.

Acta Crystallogr Sect D: Cryst Struct Commun 66:486-501.

57. DeLano WL. 2002. The PyMOL molecular graphics system.

**TABLE 1** Statistics of EIHA<sup>AHA</sup> for data collection and structure refinement

|                                                     | <b>EIHA<sup>AHA</sup></b> |
|-----------------------------------------------------|---------------------------|
| <b>Data collection</b>                              |                           |
| Space group                                         | <i>P1</i>                 |
| Cell dimensions                                     |                           |
| <i>a, b, c</i> (Å)                                  | 52.3, 53.8, 94.9          |
| $\alpha, \beta, \gamma$ (°)                         | 91.1, 90.0, 61.0          |
| Resolution (Å)                                      | 50.0–1.80 (1.86–1.80) *   |
| <i>R</i> <sub>merge</sub>                           | 7.4 (24.3)                |
| <i>I</i> / $\sigma$ ( <i>I</i> )                    | 26.6 (3.25)               |
| Completeness (%)                                    | 96.1 (94.5)               |
| Redundancy                                          | 2.1 (2.0)                 |
| <b>Refinement</b>                                   |                           |
| Resolution (Å)                                      | 33.8–1.80 (1.82–1.80)     |
| No. reflections                                     | 80171 (2274)              |
| <i>R</i> <sub>work</sub> / <i>R</i> <sub>free</sub> | 20.8 (26.4)/24.2 (36.8)   |
| No. atoms                                           |                           |
| Protein                                             | 6038                      |
| Glycerol                                            | 66                        |
| Water                                               | 265                       |
| <i>B</i> -factor (Å <sup>2</sup> )                  |                           |
| Protein                                             | 25.8                      |
| Glycerol                                            | 38.1                      |
| Water                                               | 29.2                      |
| Root mean square deviations                         |                           |
| Bond lengths (Å)                                    | 0.006                     |
| Bond angles (°)                                     | 1.06                      |
| Ramachandran plot (%)                               |                           |
| Favored region                                      | 99.0                      |
| Allowed region                                      | 1.00                      |
| Outlier region                                      | 0                         |
| <b>PDB ID</b>                                       | <b>4TKZ</b>               |

\*Data for the highest resolution shell is shown in parenthesis.

**TABLE 2** Primers used in this study

| Primer                 | Sequence                                       |
|------------------------|------------------------------------------------|
| gbs1270_F              | 5'-GGCCATGGAAATCAAAAAGAAACATCGTATTATG-3'       |
| gbs1270_R              | 5'- CCCCTCGAGGATAGCTAATTGGTCTGTTTTTGTTCATG-3'  |
| gbs1890_F              | 5'-GGCATATGATAAAAATTATTATTGTAGCACACGGC-3'      |
| gbs1890_R              | 5'-GGCTCGAGAATGCCTCCCTCAAAAGTTGCTTCTGCAGT-3'   |
| gbs1886-1887-1888_F    | 5'- ATGGCAGCAGGACCAAATATTG -3'                 |
| gbs1886-1887-1888_R    | 5'-TTAAGCTAAAATACCTAACCAGCTACCAAG-3'           |
| gbs1886-1887-1888_invF | 5'- GTATCGGTGATTCTTTATCACAATTTTGC -3'          |
| gbs1886-1887-1888_invR | 5'- TCCAATAAATATAATCTAAAATATTA ACTTCCACAGC -3' |
| Km <sup>r</sup> _F     | 5'- CCTGGCCAGGGGGAAAGCCACGTTGTGTCTCAAAA -3'    |
| Km <sup>r</sup> _R     | 5'- CCTGGCCAGGGGGCGCTGAGGTCTGCCTCGTGAAG -3'    |

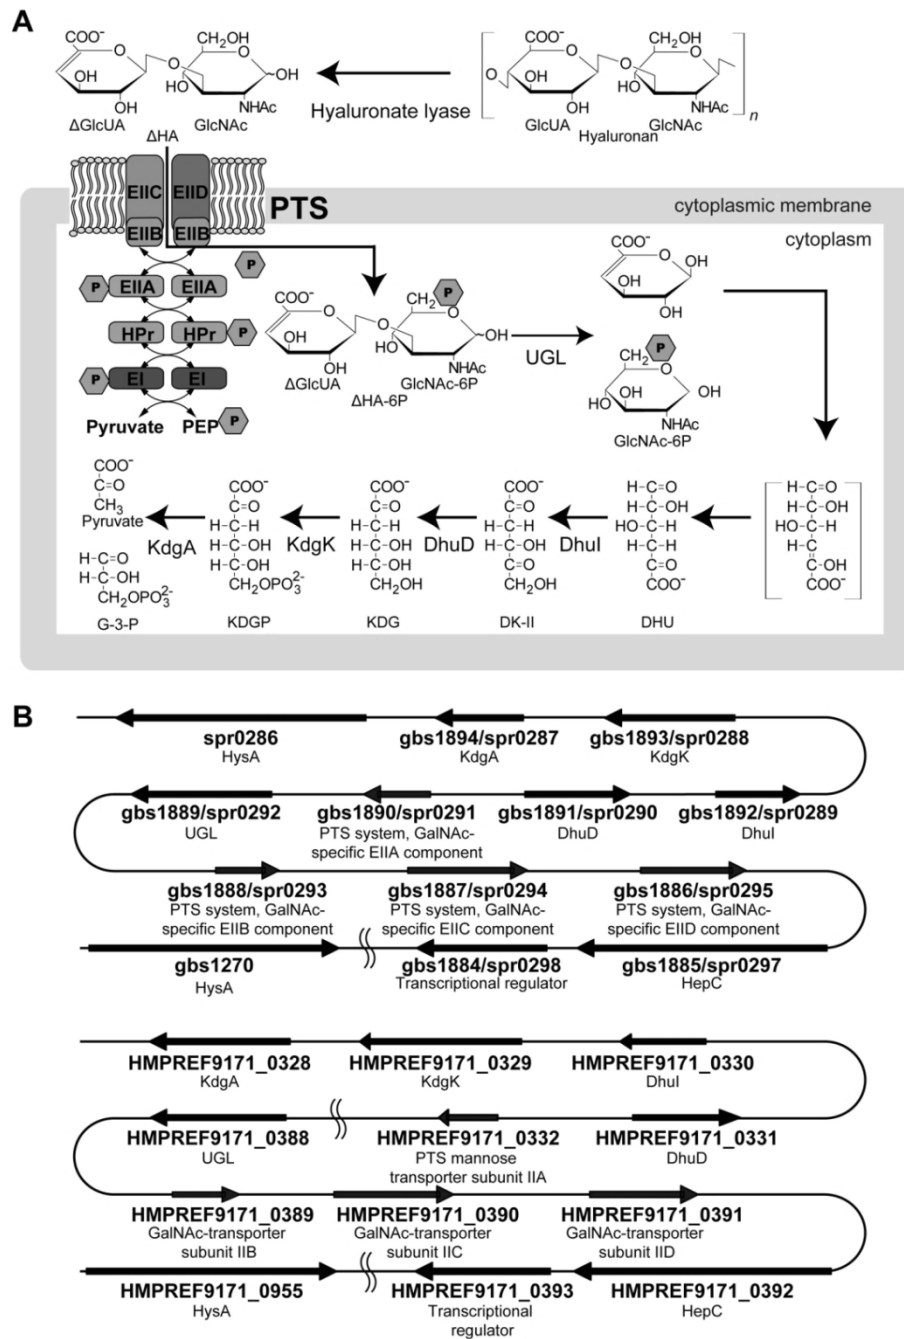

**FIG 1** PTS import model and GAG genetic cluster. (A) *S. agalactiae* PTS import model.

Cell-surface hyaluronate lyase (spr0286/gbs1270/HMPREF9171\_0955) depolymerizes

hyaluronan and the resulting unsaturated hyaluronan disaccharides are incorporated into the

cytoplasm by the phosphotransferase system (PTS)

(spr0291-0293-0294-0295/gbs1886-1887-1888-1890/HMPREF9171\_0332-0389-0390-0391).

During the import process, a phosphate group is transferred to the substrate. After import has been achieved, unsaturated glucuronyl hydrolase (UGL)

(spr0292/gbs1889/HMPREF9171\_0388) degrades the disaccharides to monosaccharides. The resulting unsaturated uronate is non-enzymatically converted to

4-deoxy-L-*threo*-5-hexosulose-uronate (DHU). DHU is metabolized to

3-deoxy-D-*glycero*-2,5-hexodiulosonate (DK-II) by 4-deoxy-L-*threo*-5-hexosulose-uronate

ketol-isomerase (DhuI) (spr0289/gbs1892/HMPREF9171\_0330). DK-II is then metabolized to

2-keto-3-deoxy-D-gluconate (KDG) by 2-keto-3-deoxy-D-gluconate dehydrogenase (DhuD)

(spr0290/gbs1891/HMPREF9171\_0331). KDG is converted to pyruvate and

glyceraldehyde-3-phosphate (G-3-P) via 2-keto-3-deoxy-6-phosphogluconate (KDGP), through

successive reactions catalyzed by 2-keto-3-deoxygluconate kinase (KdgK)

(spr0288/gbs1893/HMPREF9171\_0329) and 2-keto-3-deoxy-6-phosphogluconate aldolase

(KdgA) (spr0287/gbs1894/HMPREF9171\_0328). (B) GAG genetic clusters in the genomes of *S.*

*pneumoniae* R6 (spr), *S. agalactiae* NEM316 (gbs) (upper), and *S. agalactiae* 5671

(HMPREF9171) (lower).

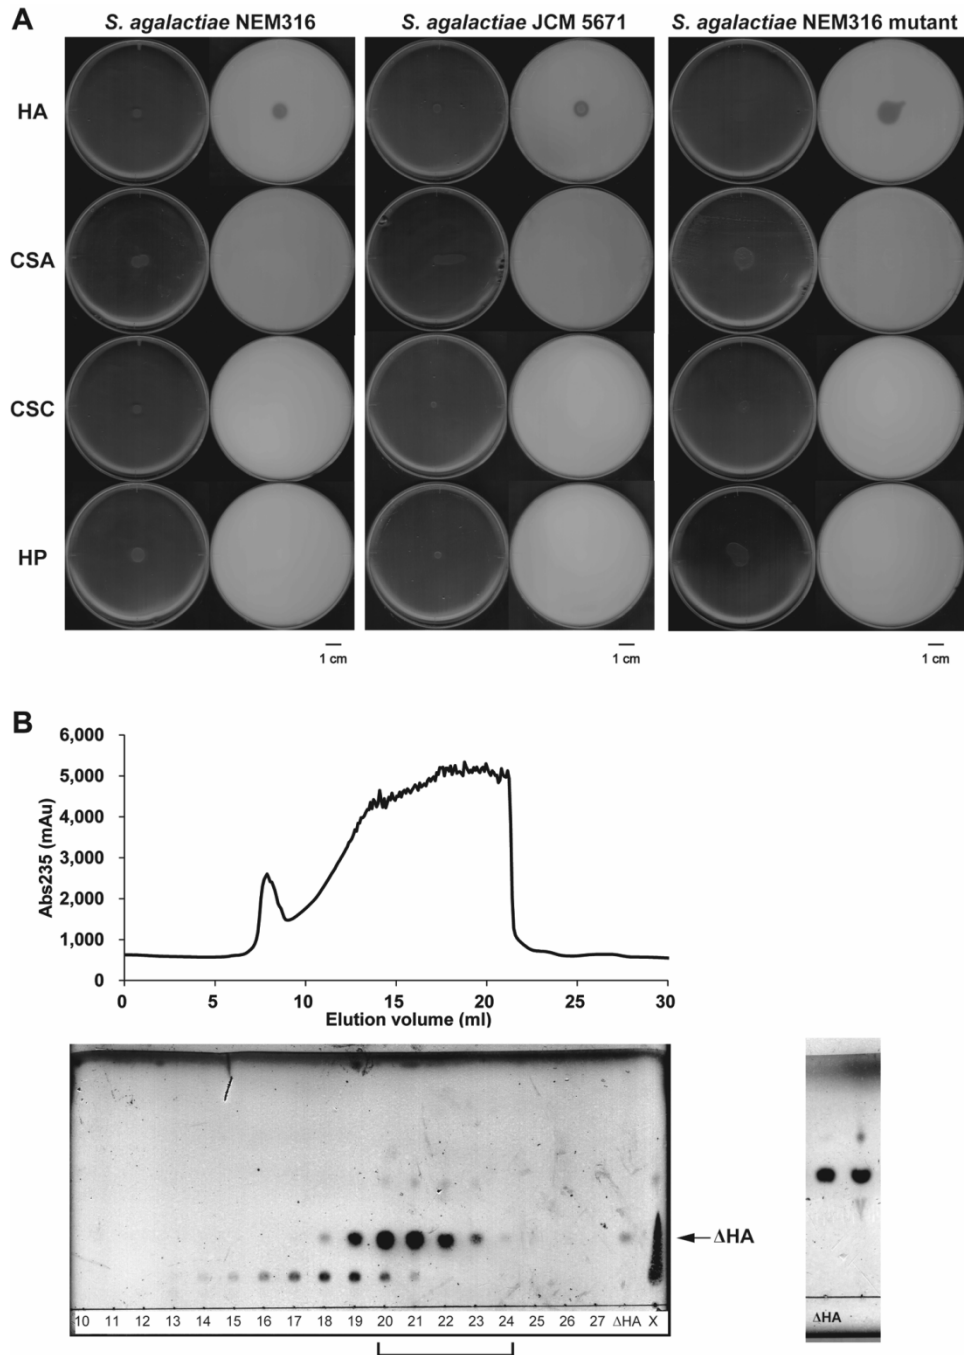

**FIG 2** Degradation of GAGs by *S. agalactiae*. (A) Degradation of GAGs by *S. agalactiae* NEM316, *S. agalactiae* JCM 5671, and *S. agalactiae* NEM316 PTS mutant. The left and right



plates in each panel are images taken before and after the addition of acetic acid, respectively. Plates contained hyaluronan (HA), chondroitin sulfate A (CSA), chondroitin sulfate C (CSC), or heparin (HP). (B) Preparation of unsaturated hyaluronan disaccharide. Shown are the elution profiles of unsaturated hyaluronan disaccharide during gel filtration chromatography (upper), and TLC profiles of fractions from gel filtration chromatography (lower, left). Numbers denote elution volume (ml). X represents a sample of the reaction mixture before gel filtration chromatography. TLC profiles of the mixture of collected fractions are also shown (lower, right). The mixture (lane, right) was found to contain a saccharide as a main product that corresponded to the standard unsaturated hyaluronan disaccharide ( $\Delta$ HA) (lane, left).

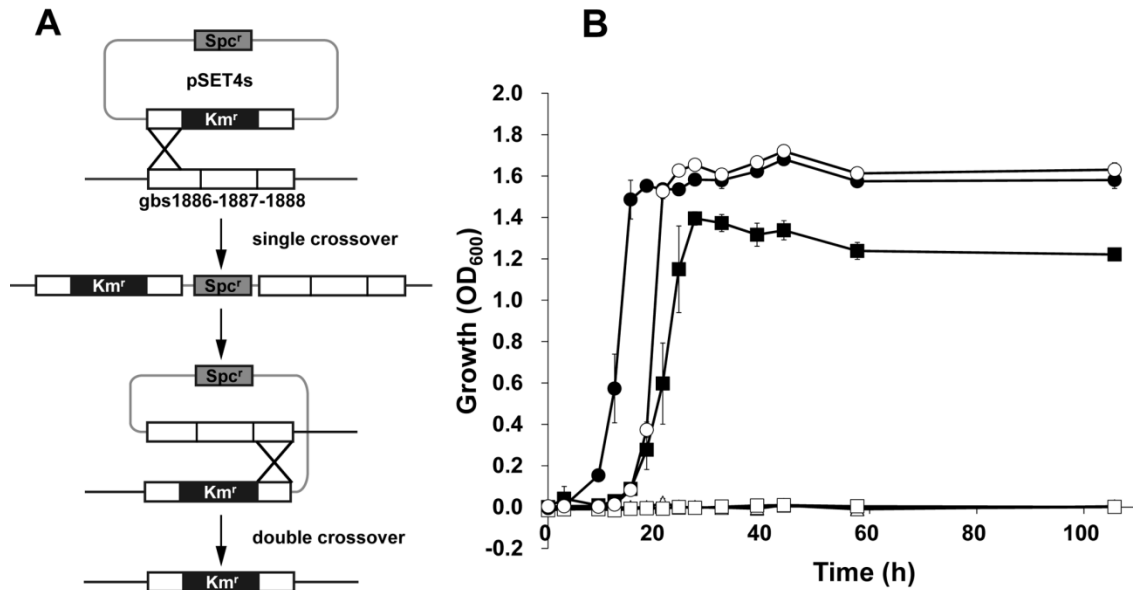

**FIG 3** Growth of *S. agalactiae* in the presence of hyaluronan. (A) Construct of the PTS mutant.

The *gbs1886-1887-1888* operon gene in the pSET4s plasmid was disrupted by the insertion of *Km<sup>r</sup>*. The pSET4s-*gbs1886-1887-1888*::*Km<sup>r</sup>* plasmid was introduced into the streptococcal cells.

A double crossover mutant was obtained by homologous recombination. (B) Wild-type (closed) and the PTS mutant (open) in minimum medium containing hyaluronan (square), glucose (circle), or no saccharide (triangle).

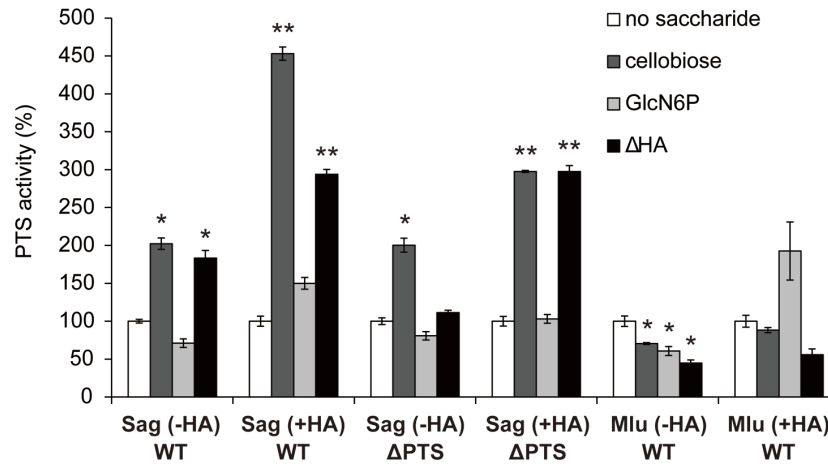

**FIG 4** Import of unsaturated hyaluronan disaccharide by *S. agalactiae* PTS. Levels of PTS import into *S. agalactiae* and *M. luteus* grown in the absence or presence of hyaluronan. *S. agalactiae* wild-type cells grown in the absence of hyaluronan, Sag (-HA) WT; *S. agalactiae* wild-type cells grown in the presence of hyaluronan, Sag (+HA) WT; *S. agalactiae* PTS mutant cells grown in the absence of hyaluronan, Sag (-HA) ΔPTS; *S. agalactiae* PTS mutant cells grown in the presence of hyaluronan, Sag (+HA) ΔPTS; *M. luteus* wild-type cells grown in the absence of hyaluronan, Mlu (-HA) WT; and *M. luteus* wild-type grown in the presence of hyaluronan, Mlu (+HA) WT. No saccharide, white; positive control (cellobiose), dark gray; negative control [glucosamine-6-phosphate (GlcN6P)], light gray; and unsaturated hyaluronan disaccharide (ΔHA), black. Each measurement represents the mean of three individual experiments (means ± standard deviations). A significant difference was statistically determined using Student's t-test (\*\*p < 0.01; \*p < 0.05).

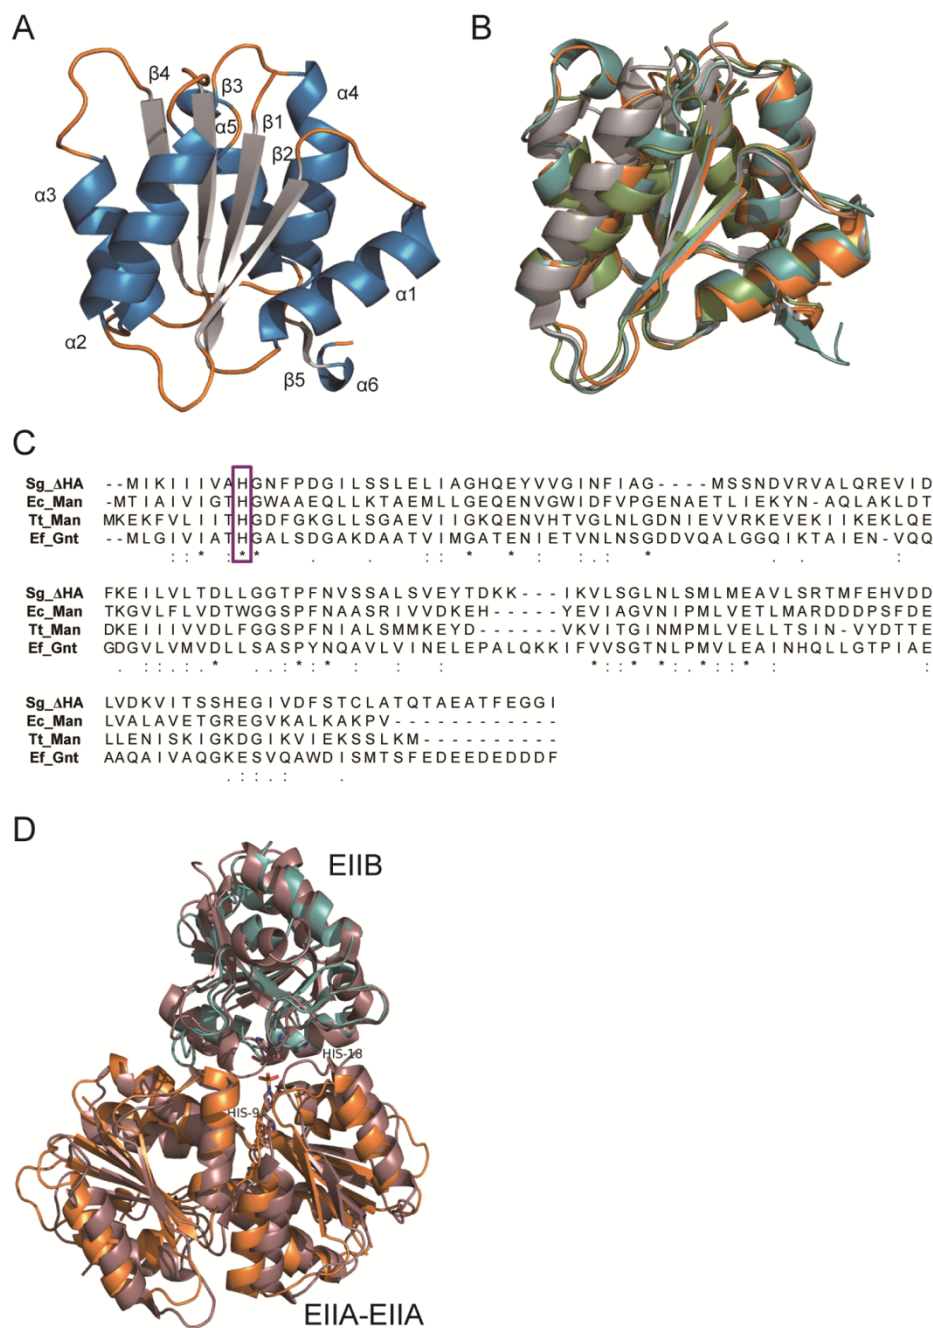

**FIG 5** Three-dimensional structure of *S. agalactiae* PTS EIIA<sup>ΔHA</sup>. (A) Overall structure of *S. agalactiae* EIIA<sup>ΔHA</sup>. Blue, α-helices; gray, β-strands; and orange, loops. (B) Homologue proteins

of *S. agalactiae* EIIA<sup>ΔHA</sup>. Orange, *S. agalactiae* EIIA<sup>ΔHA</sup> (Sg\_ΔHA); light green, *E. coli* mannose EIIA<sup>Man</sup> (Ec\_Man); gray, *T.tengcongensis* mannose EIIA<sup>Man</sup> (Tt\_Man); and cyan, *E. faecalis* gluconate EIIA<sup>Gnt</sup> (Ef\_Gnt). (C) Primary structure alignment of EIIA. (D) Superimposition of *S. agalactiae* EIIA<sup>ΔHA</sup>-EIIB<sup>ΔHA</sup> and *E. coli* EIIA<sup>Man</sup>-EIIB<sup>Man</sup> complexes. Orange, *S. agalactiae* EIIA<sup>ΔHA</sup>; cyan, *S. agalactiae* EIIB<sup>ΔHA</sup> (modeling); dark pink, *E. coli* EIIA<sup>Man</sup>-EIIB<sup>Man</sup> complex.
